# Supplementary material
Source: PubMed Central journal article supplement (PMC10052619)
Supplement: sj-pdf-1-han-10.1177_15589447211017223.pdf [file sj-pdf-1-han-10.1177_15589447211017223.pdf]

**Supplemental Table S1. Radiographic measurements.**

|                                                      | RSL-arthrodesis with a neo-<br>DRUJ (n=6) | Reverse wedge<br>osteotomy (n=7) |                      |
|------------------------------------------------------|-------------------------------------------|----------------------------------|----------------------|
|                                                      |                                           | <i>Preoperative</i>              | <i>Postoperative</i> |
| <b>Ulnar tilt, mean (SD), degrees</b>                | 53.2 (4.1)                                | 47.3 (9.8)                       | 40.2 (16.2)          |
| <b>Lunate subsidence, mean (SD), mm</b>              | 2.0 (6.6)                                 | 7.7 (6.7)                        | 1.7 (5.4)            |
| <b>Lunate fossa angle, mean (SD), degrees</b>        | 53.7 (9.7)                                | 48.8 (12.3)                      | 39.5 (14.5)          |
| <b>Palmar tilt, mean (SD), degrees</b>               | 33.0 (11.1)                               | 25.1 (7.1)                       | 8.7 (7.3)            |
| <b>Palmar carpal displacement, mean (SD),<br/>mm</b> | 54.8 (8.2)                                | 44.8 (14.9)                      | 42.8 (18.9)          |
